# Supplementary material for: Air Pollution and Atopic Dermatitis (AD): The Impact of Particulate Matter (PM10) on an AD Mouse-Model
Source: PubMed Central journal article supplement (PMC7503766; doi:10.3390/ijms21176079), 2020-08-24
Supplement: ijms-21-06079-s001.pdf [file ijms-21-06079-s001.pdf]

# **Air Pollution and Atopic Dermatitis (AD): The Impact of Particulate Matter (PM<sub>10</sub>) on an AD Mouse-Model**

**Yu Ri Woo <sup>1,†</sup>, Seo-Yeon Park <sup>2,†</sup>, Keonwoo Choi <sup>2</sup>, Eun Sun Hong <sup>1</sup>, Sungjoo Kim <sup>2</sup> and Hei Sung Kim <sup>1,2,\*</sup>**

**Supplementary Table S1.** Top 50 significantly upregulated and downregulated genes (log<sub>2</sub> fold change ≥ 1.5 and adjusted *p*-value < 0.05) in each compared group

|    | PM vs. NC            | Log <sub>2</sub> FC | AD vs. NC            | Log <sub>2</sub> FC | AD + PM vs. NC       | Log <sub>2</sub> FC | AD + PM vs. AD       | Log <sub>2</sub> FC | AD + PM vs. PM       | Log <sub>2</sub> FC | PM vs. AD        | Log <sub>2</sub> FC |
|----|----------------------|---------------------|----------------------|---------------------|----------------------|---------------------|----------------------|---------------------|----------------------|---------------------|------------------|---------------------|
| 1  | <i>Sprr2d</i>        | 4.537781            | <i>Rnase2a</i>       | 15.353418           | <i>S100a9</i>        | 175.102606          | <i>S100a9</i>        | 21.032206           | <i>S100a9</i>        | 43.232510           | <i>Npy</i>       | 2.912855            |
| 2  | <i>S100a9</i>        | 4.050253            | <i>S100a9</i>        | 8.325451            | <i>Sprr2d</i>        | 122.348283          | <i>Sprr2b</i>        | 19.765663           | <i>S100a8</i>        | 36.247161           | <i>Fam3b</i>     | 2.237210            |
| 3  | <i>Stfa3</i>         | 3.884888            | <i>Sprr2d</i>        | 7.414729            | <i>Sprr2b</i>        | 99.190350           | <i>Saa3</i>          | 16.871093           | <i>Saa3</i>          | 33.226551           | <i>Guca2a</i>    | 2.082410            |
| 4  | <i>Chil1</i>         | 3.852430            | <i>Thrsp</i>         | 6.074408            | <i>S100a8</i>        | 86.466724           | <i>S100a8</i>        | 16.615182           | <i>Sprr2b</i>        | 30.495545           | <i>Wfdc3</i>     | 2.057602            |
| 5  | <i>Dbp</i>           | 3.637145            | <i>Sprr2a1</i>       | 5.429848            | <i>Sprr2a3</i>       | 68.747026           | <i>Sprr2d</i>        | 16.500708           | <i>Sprr2d</i>        | 26.962138           | <i>Il22ra2</i>   | 1.771707            |
| 6  | <i>Il1b</i>          | 3.375845            | <i>S100a8</i>        | 5.204079            | <i>Serpib3a</i>      | 65.385001           | <i>Sprr2a3</i>       | 14.139278           | <i>Sprr2a3</i>       | 21.554361           | <i>Ugt1a1</i>    | 1.765702            |
| 7  | <i>Sprr2a1</i>       | 3.293317            | <i>Serpib3a</i>      | 5.127475            | <i>Stfa3</i>         | 51.600623           | <i>Serpib3a</i>      | 12.751891           | <i>Serpib3a</i>      | 21.542993           | <i>Tesc</i>      | 1.728145            |
| 8  | <i>Lce1h</i>         | 3.272727            | <i>Sprr2b</i>        | 5.018316            | <i>Sprr2a1</i>       | 50.181213           | <i>Sprr2e</i>        | 12.506733           | <i>Sprr2e</i>        | 16.809473           | <i>Serpine2</i>  | 1.705879            |
| 9  | <i>Sprr2b</i>        | 3.252618            | <i>C1qtnf3</i>       | 4.536723            | <i>Sprr2e</i>        | 43.315581           | <i>Gm5416</i>        | 10.651026           | <i>Gm5416</i>        | 16.545459           | <i>Crabp1</i>    | 1.702428            |
| 10 | <i>Lce1g</i>         | 3.202117            | <i>Cxcl1</i>         | 3.865055            | <i>BC100530</i>      | 29.494805           | <i>Stfa3</i>         | 9.717934            | <i>Sprr2a1</i>       | 15.237285           | <i>Ptgs1</i>     | 1.689424            |
| 11 | <i>Sprr2a3</i>       | 3.189472            | <i>2610528A11Rik</i> | 3.748969            | <i>Saa3</i>          | 29.235396           | <i>Sprr2a1</i>       | 9.241734            | <i>Sprr2i</i>        | 13.596652           | <i>Cbarp</i>     | 1.668524            |
| 12 | <i>2610528A11Rik</i> | 3.128210            | <i>Angptl8</i>       | 3.702645            | <i>BC117090</i>      | 27.688896           | <i>Sprr2f</i>        | 8.996294            | <i>Stfa3</i>         | 13.282395           | <i>Adh6a</i>     | 1.641637            |
| 13 | <i>Clca3a2</i>       | 3.088569            | <i>Tnfaip6</i>       | 3.665933            | <i>2610528A11Rik</i> | 27.119970           | <i>Sprr2i</i>        | 8.775266            | <i>BC117090</i>      | 11.971038           | <i>Gdpd2</i>     | 1.610049            |
| 14 | <i>Lce1k</i>         | 3.049365            | <i>Rgs1</i>          | 3.463642            | <i>Sprr2i</i>        | 26.165916           | <i>BC117090</i>      | 8.733096            | <i>Sprr2f</i>        | 11.898848           | <i>Rarres1</i>   | 1.602208            |
| 15 | <i>Serpib3a</i>      | 3.035094            | <i>Sprr2e</i>        | 3.463381            | <i>Gm5416</i>        | 25.737129           | <i>Krt16</i>         | 8.550596            | <i>Lcn2</i>          | 11.314357           | <i>Ano7</i>      | 1.600783            |
| 16 | <i>Thrsp</i>         | 3.008267            | <i>Chil1</i>         | 3.413080            | <i>Chil1</i>         | 23.799435           | <i>Lcn2</i>          | 8.085627            | <i>Krt6b</i>         | 10.906282           | <i>Serpina3j</i> | 1.593097            |
| 17 | <i>Krtap21-1</i>     | 2.924621            | <i>8430408G22Rik</i> | 3.320192            | <i>Sprr2f</i>        | 22.962500           | <i>Krt6b</i>         | 7.671900            | <i>BC100530</i>      | 10.128274           | <i>Acox1</i>     | 1.588232            |
| 18 | <i>BC100530</i>      | 2.912126            | <i>Ccl8</i>          | 3.262495            | <i>Lcn2</i>          | 19.571697           | <i>BC100530</i>      | 7.555283            | <i>Lce3b</i>         | 9.559686            | <i>Adh1</i>      | 1.587999            |
| 19 | <i>Aox4</i>          | 2.876501            | <i>Ccl7</i>          | 3.176686            | <i>Stfa1</i>         | 17.513492           | <i>Il1b</i>          | 7.414423            | <i>Krt16</i>         | 9.550772            | <i>Mt3</i>       | 1.565046            |
| 20 | <i>Lce1f</i>         | 2.848601            | <i>Cd163l1</i>       | 3.159971            | <i>Rnase2a</i>       | 17.480094           | <i>2610528A11Rik</i> | 7.233981            | <i>Ms4a6d</i>        | 9.338424            | <i>Ndp</i>       | 1.560080            |
| 21 | <i>Lce1i</i>         | 2.846397            | <i>Ptx3</i>          | 3.071325            | <i>Serpib3b</i>      | 17.026990           | <i>Chil1</i>         | 6.973008            | <i>Stfa1</i>         | 8.717599            | <i>Slc22a4</i>   | 1.531051            |
| 22 | <i>Casp14</i>        | 2.835712            | <i>Fcer1a</i>        | 3.066804            | <i>Il1b</i>          | 15.898589           | <i>Stfa1</i>         | 6.855981            | <i>2610528A11Rik</i> | 8.669484            | <i>Tecr</i>      | 1.520385            |
| 23 | <i>5830411N06Rik</i> | 2.834779            | <i>Tpsab1</i>        | 3.046646            | <i>Cxcl1</i>         | 15.266021           | <i>Lce3b</i>         | 6.312606            | <i>Wfdc17</i>        | 8.488851            | <i>Ano9</i>      | 1.514115            |
| 24 | <i>Rgs1</i>          | 2.776930            | <i>Sprr2i</i>        | 2.981781            | <i>Krt16</i>         | 14.027059           | <i>Serpib3b</i>      | 6.150751            | <i>Csf3r</i>         | 7.690534            | <i>Hsd3b6</i>    | 1.501121            |
| 25 | <i>Klk9</i>          | 2.747518            | <i>Cxcr6</i>         | 2.929345            | <i>Gsdmc</i>         | 13.943653           | <i>Klk13</i>         | 6.027555            | <i>Lce3a</i>         | 7.581050            |                  |                     |
| 26 | <i>Cd207</i>         | 2.600235            | <i>Krtap21-1</i>     | 2.925668            | <i>Retnlg</i>        | 13.784051           | <i>Tmprss11g</i>     | 6.023283            | <i>Ccl8</i>          | 7.572985            |                  |                     |
| 27 | <i>Sprr2e</i>        | 2.576855            | <i>5830411N06Rik</i> | 2.915997            | <i>Klk13</i>         | 13.571149           | <i>Lce3a</i>         | 5.917627            | <i>Cxcl1</i>         | 7.504513            |                  |                     |
| 28 | <i>Chit1</i>         | 2.546383            | <i>Igfbp2</i>        | 2.877333            | <i>Lce3b</i>         | 12.008217           | <i>Rptn</i>          | 5.506417            | <i>Timp1</i>         | 7.101924            |                  |                     |
| 29 | <i>Aadacl3</i>       | 2.524152            | <i>Tpsb2</i>         | 2.859246            | <i>Lce3a</i>         | 11.751650           | <i>Mmp3</i>          | 5.369114            | <i>Retnlg</i>        | 6.997817            |                  |                     |
| 30 | <i>Lce1d</i>         | 2.513840            | <i>Gsdmc</i>         | 2.839146            | <i>Lce3f</i>         | 11.052984           | <i>Lce3e</i>         | 5.314134            | <i>Serpib3b</i>      | 6.818736            |                  |                     |
| 31 | <i>Fam3b</i>         | 2.498548            | <i>Mrap</i>          | 2.820249            | <i>Mmp3</i>          | 10.906441           | <i>Klk9</i>          | 5.298470            | <i>Cd163</i>         | 6.801530            |                  |                     |
| 32 | <i>Serpib3b</i>      | 2.497089            | <i>Serpib3b</i>      | 2.768278            | <i>Ms4a6d</i>        | 10.838765           | <i>Bcl2l15</i>       | 5.263128            | <i>Slpi</i>          | 6.777415            |                  |                     |
| 33 | <i>8430408G22Rik</i> | 2.491011            | <i>Blk</i>           | 2.758426            | <i>Rptn</i>          | 10.626554           | <i>Slpi</i>          | 5.106645            | <i>Mmp3</i>          | 6.745412            |                  |                     |
| 34 | <i>Calm4</i>         | 2.489697            | <i>Il1f6</i>         | 2.677326            | <i>Il1f6</i>         | 10.362620           | <i>Gsdmc</i>         | 4.911213            | <i>Ms4a4a</i>        | 6.573357            |                  |                     |
| 35 | <i>Cd3g</i>          | 2.488359            | <i>Ccl12</i>         | 2.664043            | <i>Ccl8</i>          | 9.964881            | <i>Lce3f</i>         | 4.905179            | <i>Mybpc2</i>        | 6.547380            |                  |                     |
| 36 | <i>Il1f6</i>         | 2.459084            | <i>Retnlg</i>        | 2.652207            | <i>Klk9</i>          | 9.784243            | <i>Teddm3</i>        | 4.901073            | <i>Sell</i>          | 6.337477            |                  |                     |
| 37 | <i>Klk8</i>          | 2.456366            | <i>Lce1h</i>         | 2.649690            | <i>Krt6b</i>         | 9.746359            | <i>Timp1</i>         | 4.841521            | <i>Chil1</i>         | 6.177772            |                  |                     |

|       |                |          |                |          |                  |          |                 |          |                  |          |
|-------|----------------|----------|----------------|----------|------------------|----------|-----------------|----------|------------------|----------|
| 38    | <i>Apoc4</i>   | 2.416382 | <i>Ces1f</i>   | 2.632184 | <i>Slpi</i>      | 9.610843 | <i>Ms4a6d</i>   | 4.839326 | <i>Klk13</i>     | 6.164222 |
| 39    | <i>Gsdmc</i>   | 2.414530 | <i>Cd3g</i>    | 2.632181 | <i>Csf3r</i>     | 9.543424 | <i>Csf3r</i>    | 4.739358 | <i>Cd300ld3</i>  | 6.054850 |
| 40    | <i>Tmprss4</i> | 2.403543 | <i>Lce1g</i>   | 2.625508 | <i>Lce3e</i>     | 9.465151 | <i>Ms4a4a</i>   | 4.661390 | <i>Rptn</i>      | 6.011338 |
| 41    | <i>Lce1c</i>   | 2.402870 | <i>Eln</i>     | 2.622964 | <i>Timp1</i>     | 9.302482 | <i>Clec4d</i>   | 4.294255 | <i>Ccl6</i>      | 5.995977 |
| 42    | <i>Nppb</i>    | 2.390614 | <i>Cpa3</i>    | 2.616742 | <i>Wfdc17</i>    | 8.724972 | <i>Cd300ld3</i> | 4.231297 | <i>Mrc1</i>      | 5.794368 |
| 43    | <i>S100a8</i>  | 2.385476 | <i>Ccl11</i>   | 2.578108 | <i>Clec4d</i>    | 8.340879 | <i>Sell</i>     | 4.101222 | <i>Gsdmc</i>     | 5.774894 |
| 44    | <i>Lce1a2</i>  | 2.369149 | <i>Hsd11b1</i> | 2.560542 | <i>Teddm3</i>    | 8.261515 | <i>Il1f9</i>    | 4.090919 | <i>Fcgr2b</i>    | 5.765075 |
| 45    | <i>Dusp1</i>   | 2.366247 | <i>Bcl2a1b</i> | 2.559817 | <i>Sell</i>      | 8.249449 | <i>Gsdmc2</i>   | 4.004163 | <i>Ccr1</i>      | 5.588996 |
| 46    | <i>Cyp1a1</i>  | 2.364800 | <i>Fasn</i>    | 2.553306 | <i>Gsdmc2</i>    | 8.046147 | <i>Rnase2b</i>  | 3.941229 | <i>Lce3f</i>     | 5.526953 |
| 47    | <i>Lce1e</i>   | 2.351248 | <i>Mcpt4</i>   | 2.552227 | <i>Bcl2l15</i>   | 8.039882 | <i>Cxcr2</i>    | 3.934086 | <i>Rnase2b</i>   | 5.485106 |
| 48    | <i>Lce1b</i>   | 2.344811 | <i>Cd209e</i>  | 2.480916 | <i>Ms4a4a</i>    | 8.018789 | <i>Il1f6</i>    | 3.870511 | <i>Ms4a6c</i>    | 5.451113 |
| 49    | <i>Cxcr6</i>   | 2.343134 | <i>Cma1</i>    | 2.449102 | <i>Tmprss11g</i> | 7.967437 | <i>Ifitm1</i>   | 3.852028 | <i>Rnase2a</i>   | 5.250776 |
| 50    | <i>Oas1f</i>   | 2.326978 | <i>Ptges</i>   | 2.418173 | <i>Cd163</i>     | 7.650302 | <i>Fetub</i>    | 3.822046 | <i>Tmprss11g</i> | 5.243561 |
| Other | <i>Klk13</i>   | 2.2016   | <i>Ccl2</i>    | 2.414083 | <i>Fasn</i>      | 2.203831 |                 |          |                  |          |
|       | <i>Cxcl1</i>   | 2.034245 | <i>Gm436</i>   | 2.385544 | <i>Nfkbid</i>    | 1.785860 |                 |          |                  |          |
|       | <i>Krt1</i>    | 2.012479 | <i>Aox4</i>    | 2.30949  | <i>Nfkb1</i>     | 1.724704 |                 |          |                  |          |
|       | <i>Il-22</i>   | 1.980533 | <i>Klk13</i>   | 2.251518 | <i>Scd1</i>      | 1.718452 |                 |          |                  |          |
|       | <i>Nfkbia</i>  | 1.85684  | <i>Ms4a6d</i>  | 2.239726 |                  |          |                 |          |                  |          |
|       | <i>Krt10</i>   | 1.563309 | <i>Ctsk</i>    | 2.227424 |                  |          |                 |          |                  |          |
|       | <i>Scd1</i>    | 1.556242 | <i>Lilr4b</i>  | 2.2165   |                  |          |                 |          |                  |          |
|       | <i>Msmo1</i>   | 1.555874 | <i>Lilr4b</i>  | 2.2165   |                  |          |                 |          |                  |          |
|       | <i>Il-18</i>   | 1.545413 | <i>Mmp3</i>    | 2.03133  |                  |          |                 |          |                  |          |
|       |                |          | <i>Gsdmc2</i>  | 2.009446 |                  |          |                 |          |                  |          |
|       |                |          | <i>Pdss1</i>   | 2.009415 |                  |          |                 |          |                  |          |
|       |                |          | <i>Aadacl3</i> | 2.006186 |                  |          |                 |          |                  |          |
|       |                |          | <i>Col6a2</i>  | 1.975488 |                  |          |                 |          |                  |          |
|       |                |          | <i>Lox</i>     | 1.970348 |                  |          |                 |          |                  |          |
|       |                |          | <i>Il1f8</i>   | 1.930127 |                  |          |                 |          |                  |          |
|       |                |          | <i>Rptn</i>    | 1.929849 |                  |          |                 |          |                  |          |
|       |                |          | <i>Col6a1</i>  | 1.91373  |                  |          |                 |          |                  |          |
|       |                |          | <i>Mrgprb1</i> | 1.911956 |                  |          |                 |          |                  |          |
|       |                |          | <i>Mmp19</i>   | 1.909659 |                  |          |                 |          |                  |          |
|       |                |          | <i>Sgpp2</i>   | 1.874239 |                  |          |                 |          |                  |          |
|       |                |          | <i>Adam12</i>  | 1.872757 |                  |          |                 |          |                  |          |
|       |                |          | <i>Lce1f</i>   | 1.856882 |                  |          |                 |          |                  |          |
|       |                |          | <i>Degs2</i>   | 1.851576 |                  |          |                 |          |                  |          |
|       |                |          | <i>Mrc1</i>    | 1.847883 |                  |          |                 |          |                  |          |
|       |                |          | <i>Gpr65</i>   | 1.733434 |                  |          |                 |          |                  |          |
|       |                |          | <i>Lrcc17</i>  | 1.725056 |                  |          |                 |          |                  |          |
|       |                |          | <i>Ms4a4a</i>  | 1.720257 |                  |          |                 |          |                  |          |
|       |                |          | <i>Acot5</i>   | 1.71783  |                  |          |                 |          |                  |          |

---

|               |          |
|---------------|----------|
| <i>Col6a3</i> | 1.70334  |
| <i>Prss27</i> | 1.680144 |
| <i>Aadac</i>  | 1.671635 |
| <i>Ms4a2</i>  | 1.644655 |
| <i>Slc5a1</i> | 1.619429 |
| <i>Elovl3</i> | 1.605484 |
| <i>Cyp7b1</i> | 1.576083 |
| <i>Cdh11</i>  | 1.557458 |

---
